# Supplementary material for: Nuclear Reprogramming: Kinetics of Cell Cycle and Metabolic Progression as Determinants of Success
Source: PubMed Central journal article supplement (PMC3329427; doi:10.1371/journal.pone.0035322), 2012-04-18

NT embryos;  $F = 0.488$ ,  $sn = 0.909$ ,  $pr = 0.333$

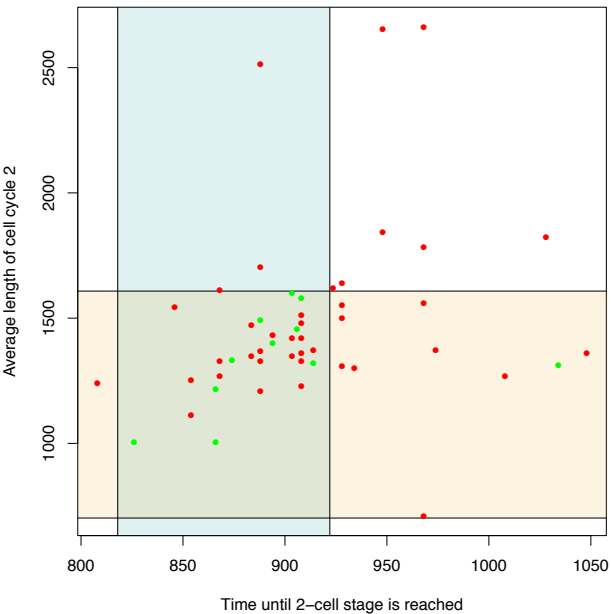

ICSI embryos;  $F = 0.778$ ,  $sn = 0.778$ ,  $pr = 0.778$

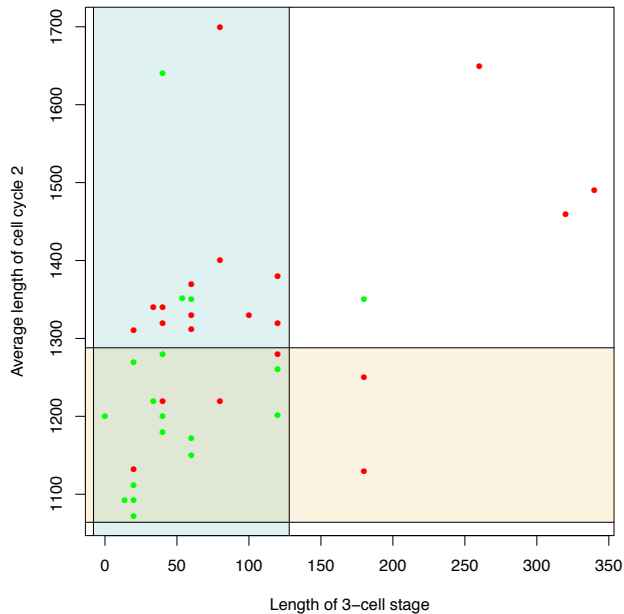

Supplement: pone.0035322.s009.pdf [file pone.0035322.s009.pdf]
