# Supplementary material for: Nuclear Reprogramming: Kinetics of Cell Cycle and Metabolic Progression as Determinants of Success
Source: PubMed Central journal article supplement (PMC3329427; doi:10.1371/journal.pone.0035322), 2012-04-18

## ICSI

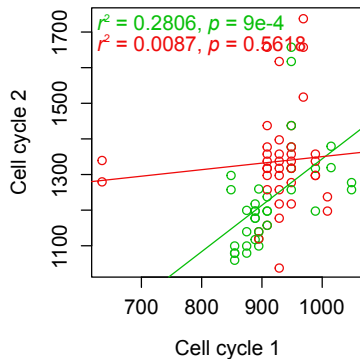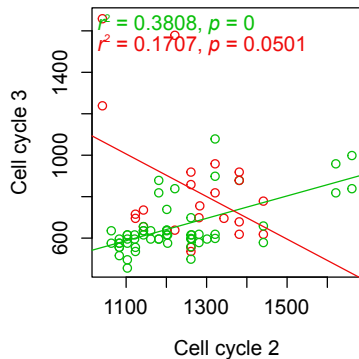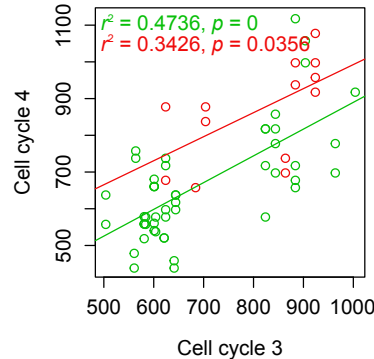

## NT

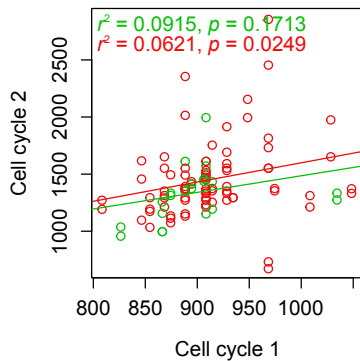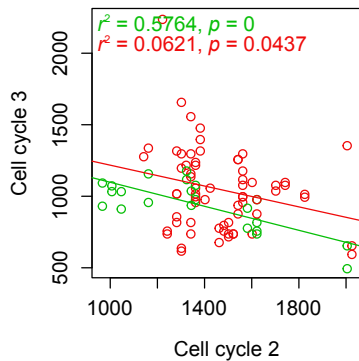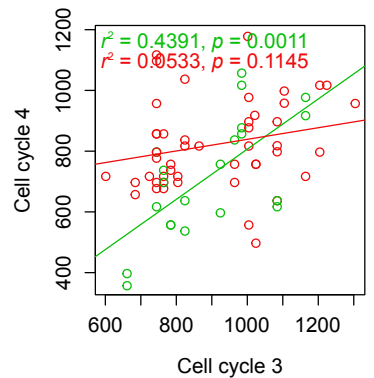

Supplement: pone.0035322.s011.pdf [file pone.0035322.s011.pdf]
